# Supplementary material for: Hybrid data-model-based mapping of soil thickness in a mountainouswatershed
Source: Copernicus journal article supplement (doi:10.5194/esurf-2020-110), 2021-01-18
Supplement: Supplementary file 2 [file esurf-2020-110-supplement.pdf]

# Supplementary Information “Hybrid data-model driven prediction of soil thickness in a mountainous watershed”

Qina Yan<sup>1</sup>, Haruko Wainwright<sup>1</sup>, Baptiste Dafflon<sup>1</sup>, Sebastian Uhlemann<sup>1</sup>, Carl I. Steefel<sup>1</sup>, Nicola Falco<sup>1</sup>, Jeffrey Kwang<sup>2</sup>, Susan S. Hubbard<sup>1</sup>

5 <sup>1</sup>Earth and Environmental Science Area, Lawrence Berkeley National Laboratory, Berkeley, CA., USA.  
<sup>2</sup> Department of Geosciences, University of Massachusetts Amherst, Amherst, MA, USA.

Correspondence to: Qina Yan ([qinayan@lbl.gov](mailto:qinayan@lbl.gov)); Haruko Wainwright ([HMWainwright@lbl.gov](mailto:HMWainwright@lbl.gov))

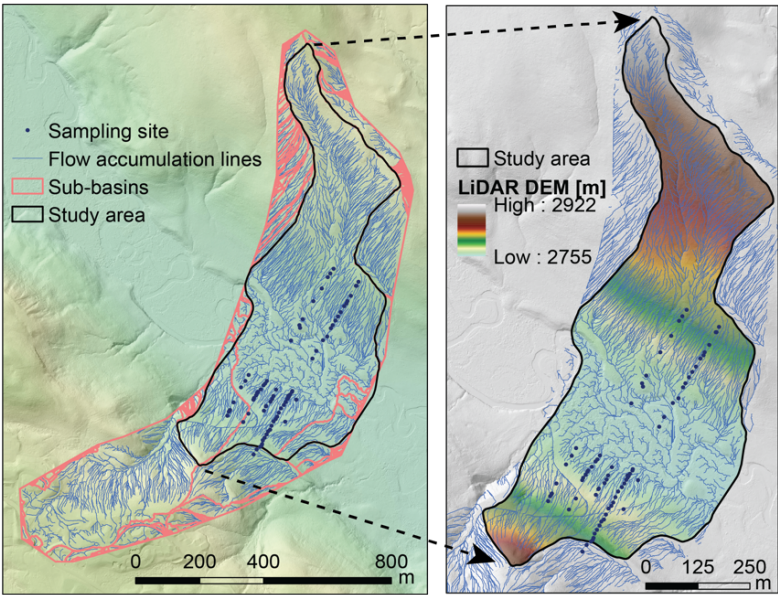

10 **Figure S1: Drainage area delineation.** The drainage areas are created by locating the pour points at the edges of the analysis window (where water would pour out of the raster), as well as sinks, then identifying the contributing area above each pour point.

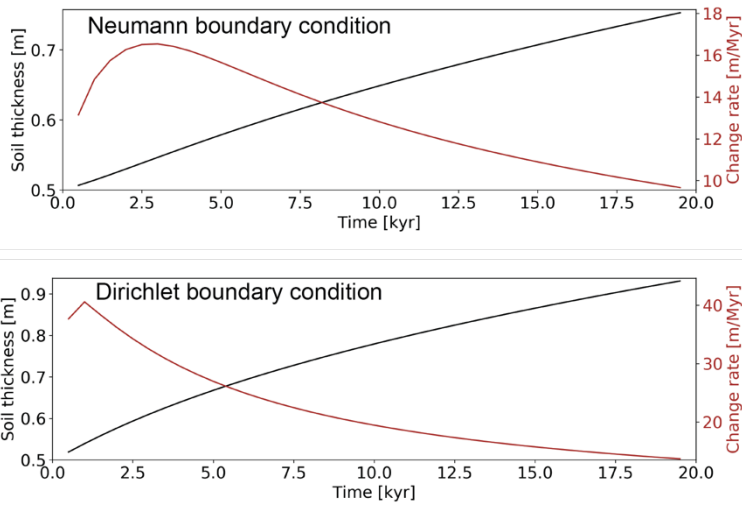

15 **Figure S2: Spatial mean values of soil thickness evolution over time. The initial soil thickness is 0.5 m, and the initial elevation is the current DEM data. We tested two types of boundary conditions: both Neumann and Dirichlet. For the Neumann boundary condition, the surface transport fluxes around the edge is zero. For the Dirichlet boundary condition, we assume the elevation on the edge is constant and the same as the initial values.**

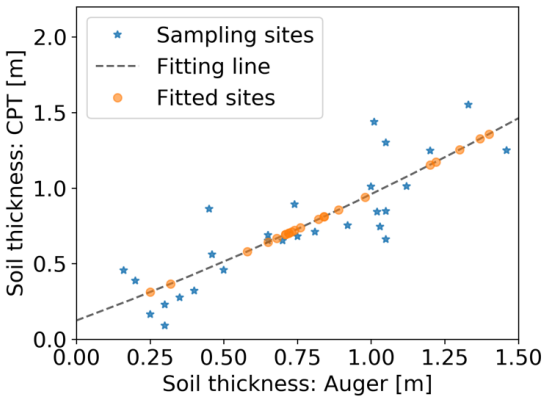

20 **Figure S3: Fitting the soil thickness of the CPT data using the auger data.**

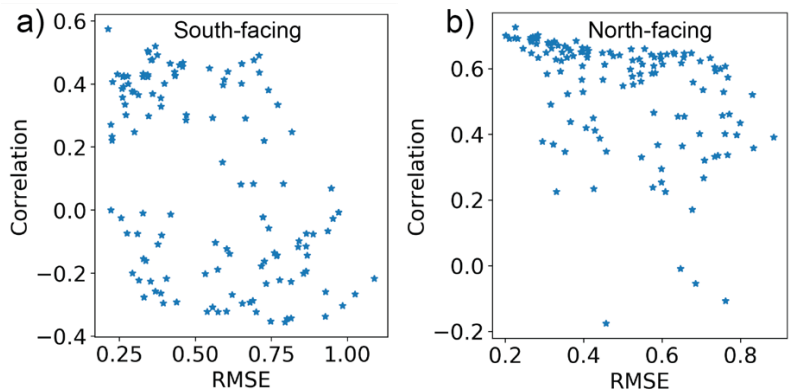

**Figure S4: Parameter calibrations for the hybrid model. The root-mean-square error (RMSE) and Pearson’s correlation between sampling and simulation results are calculated for the south-facing (a) and north-facing (b), respectively.**

**Table S1. A list of topographic variables for the correlation with soil thickness:**

| Variable names         | Explanation                                                                                                              |
|------------------------|--------------------------------------------------------------------------------------------------------------------------|
| Lidar_2018_Aspect_NEON | Topographical aspect computed at the original pixel resolution of 1m                                                     |
| Aspect_NEON_10m        | Topographical aspect computed at a pixel resolution of 10m                                                               |
| Aspect_NEON_10m_x3     | Topographical aspect computed at a pixel resolution of 10m and smoothed considering a 3x3-pixel moving window            |
| Aspect_NEON_10m_x5     | Topographical aspect computed at a pixel resolution of 10m and smoothed considering a 5x5-pixel moving window            |
| Aspect_NEON_10m_x9     | Topographical aspect computed at a pixel resolution of 10m and smoothed considering a 9x9-pixel moving window            |
| C_unc                  | Uncertainty of the estimated leaf carbon content derived by airborne hyperspectral data (pixel resolution of 1 m)        |
| C                      | Leaf carbon content derived by airborne hyperspectral data (pixel resolution of 1 m)                                     |
| N_unc                  | Uncertainty of the estimated leaf nitrogen content derived by airborne hyperspectral data (pixel resolution of 1 m)      |
| N                      | Leaf nitrogen content derived by airborne hyperspectral data (pixel resolution of 1 m)                                   |
| CN_unc                 | Uncertainty of the estimated leaf carbon/nitrogen ratio derived by airborne hyperspectral data (pixel resolution of 1 m) |
| CN                     | Leaf carbon/nitrogen derived by airborne hyperspectral data (pixel resolution of 1 m)                                    |
| chm_mosaic             | Canopy height model (i.e., plant height) at 1 m pixel resolution                                                         |

|                       |                                                                                                                          |
|-----------------------|--------------------------------------------------------------------------------------------------------------------------|
| LMA                   | Leaf mass area derived by airborne hyperspectral data (pixel resolution of 1 m)                                          |
| LMA_unc               | Uncertainty of the estimated leaf mass area derived by airborne hyperspectral data (pixel resolution of 1 m)             |
| LWC                   | Leaf water content derived by airborne hyperspectral data (pixel resolution of 1 m)                                      |
| Curv_NEON_10m         | Topographical curvature computed at a pixel resolution or 10m                                                            |
| Curv_NEON_10m_x3      | Topographical curvature computed at a pixel resolution or 10m and smoothed considering a 3x3-pixel moving window         |
| Curv_NEON_10m_x5      | Topographical curvature computed at a pixel resolution or 10m and smoothed considering a 5x5-pixel moving window         |
| Curv_NEON_10m_x9      | Topographical curvature computed at a pixel resolution or 10m and smoothed considering a 9x9-pixel moving window         |
| dsm_mosaic            | Digital surface model at 1 m resolution                                                                                  |
| dsm_mosaic_10m        | Digital surface model at 10 m resolution                                                                                 |
| dtm_mosaic            | Digital terrain model at 1 m resolution                                                                                  |
| dtm_mosaic_10m        | Digital terrain model at 10 m resolution                                                                                 |
| FlowAcc_NEON          | Topographical flow accumulation computed at the original pixel resolution of 1m                                          |
| FlowAcc_NEON_10m      | Topographical flow accumulation computed at a pixel resolution of 10m                                                    |
| FlowAcc_NEON_10m_x3   | Topographical flow accumulation computed at a pixel resolution of 10m and smoothed considering a 3x3-pixel moving window |
| FlowAcc_NEON_10m_x5   | Topographical flow accumulation computed at a pixel resolution of 10m and smoothed considering a 5x5-pixel moving window |
| FlowAcc_NEON_10m_x9   | Topographical flow accumulation computed at a pixel resolution of 10m and smoothed considering a 9x9-pixel moving window |
| NEON_mosaic_NDNI      | Normalized difference nitrogen index computed from the airborne hyperspectral data                                       |
| NEON_mosaic_NDVI      | Normalized difference vegetation index computed from the airborne hyperspectral data                                     |
| NEON_mosaic_NDWI      | Normalized difference water index computed from the airborne hyperspectral data                                          |
| NEON_mosaic_liq_water | Canopy water content estimated from the airborne hyperspectral data                                                      |
| SlopeDeg_NEON         | Topographical aspect computed at the original pixel resolution of 1m                                                     |
| SlopeDeg_NEON_x3      | Topographical slope in degree computed at a pixel resolution of 1m and smoothed considering a 3x3-pixel moving window    |
| SlopeDeg_NEON_x9      | Topographical slope in degree computed at a pixel resolution of 1m and smoothed considering a 9x9-pixel moving window    |
| SlopeDeg_NEON_10m     | Topographical slope in degree computed at a pixel resolution of 10m                                                      |

|                      |                                                                                                                        |
|----------------------|------------------------------------------------------------------------------------------------------------------------|
| SlopeDeg_NEON_10m_x3 | Topographical slope in degree computed at a pixel resolution of 10m and smoothed considering a 3x3-pixel moving window |
| SlopeDeg_NEON_10m_x5 | Topographical slope in degree computed at a pixel resolution of 10m and smoothed considering a 5x5-pixel moving window |
| SlopeDeg_NEON_10m_x9 | Topographical slope in degree computed at a pixel resolution of 10m and smoothed considering a 9x9-pixel moving window |
| Srad_10m             | Solar radiation computed at a pixel resolution of 10m.                                                                 |
| TPI_NEON_10m_x3      | Topographical position index computed at a pixel resolution of 10m and smoothed considering a 3x3-pixel moving window  |
| TPI_NEON_10m_x5      | Topographical position index computed at a pixel resolution of 10m and smoothed considering a 5x5-pixel moving window  |
| TPI_NEON_10m_x9      | Topographical position index computed at a pixel resolution of 10m and smoothed considering a 9x9-pixel moving window  |
| TWI_NEON_10m         | Topographical wetness index computed at a pixel resolution of 10m                                                      |
| TWI_NEON_10m_x3      | Topographical wetness index computed at a pixel resolution of 10m and smoothed considering a 3x3-pixel moving window   |
| TWI_NEON_10m_x5      | Topographical wetness index computed at a pixel resolution of 10m and smoothed considering a 5x5-pixel moving window   |
| TWI_NEON_10m_x9      | Topographical wetness index computed at a pixel resolution of 10m and smoothed considering a 9x9-pixel moving window   |
| UPslope_NEON_10m     | local upslope drainage area computed at a pixel resolution of 10m                                                      |
| UPslope_NEON_10m_x3  | local upslope drainage area computed at a pixel resolution of 10m and smoothed considering a 3x3-pixel moving window   |
| UPslope_NEON_10m_x5  | local upslope drainage area computed at a pixel resolution of 10m and smoothed considering a 5x5-pixel moving window   |
| UPslope_NEON_10m_x9  | local upslope drainage area computed at a pixel resolution of 10m and smoothed considering a 9x9-pixel moving window   |
